# Supplementary figures and images for: Mechanism of Aloe Vera extract protection against UVA: shelter of lysosomal membrane avoids photodamage
Source: Royal Society of Chemistry journal article supplement (doi:10.1039/c5pp00409h), 2016-01-18

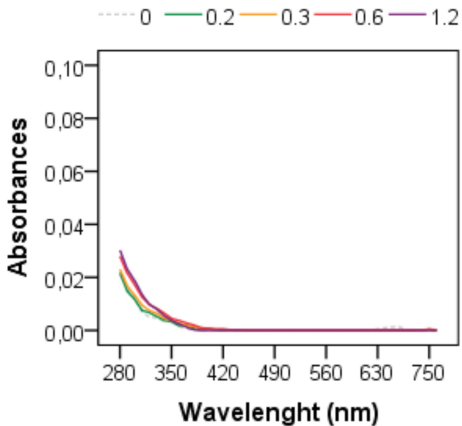

Supplement: c5pp00409h1.pdf [file c5pp00409h1.pdf]
